# Supplementary material for: Systematic Drug Repositioning Based on Clinical Side-Effects
Source: PubMed Central journal article supplement (PMC3244383; doi:10.1371/journal.pone.0028025), 2011-12-21

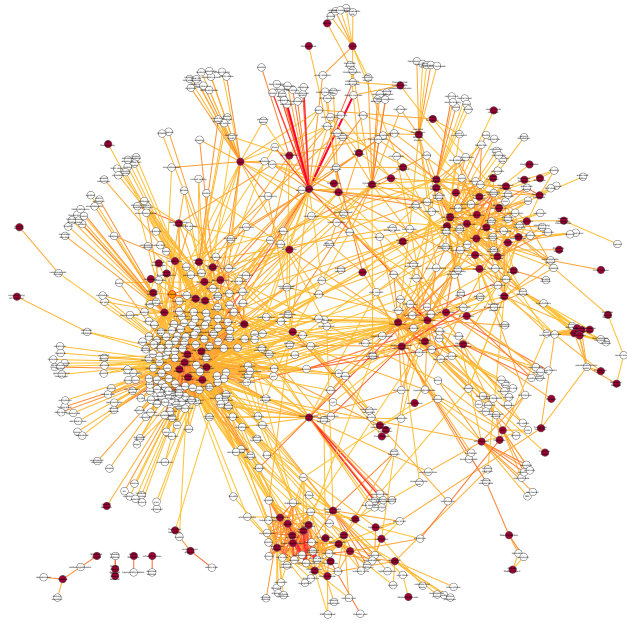

Supplement: pone.0028025.s001.pdf [file pone.0028025.s001.pdf]
